# Supplementary material
Source: PubMed Central journal article supplement (PMC8214808)
Supplement: NIHMS1631676-supplement-Sup_fig_S1.pdf [file NIHMS1631676-supplement-Sup_fig_S1.pdf]

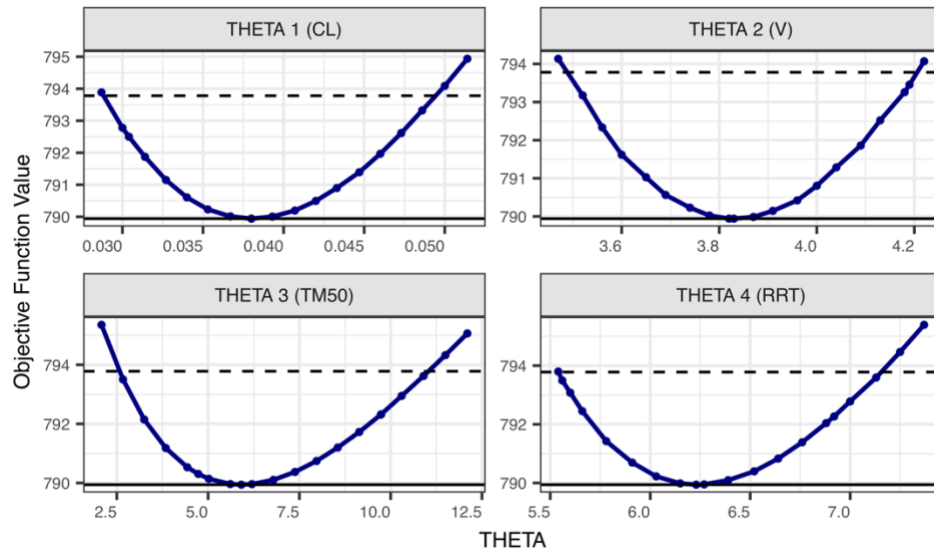

**Figure S1. Log-likelihood profiles for final model**

The black line represents the Objective Function Value (OFV) of our final model. The dotted black line represents a significant increase in OFV compared to our final model ( $p=0.05$ ,  $\Delta OFV=3.84$ ). The blue line represents the changes in OFVs when fixing the respective PK parameters to different values.

*CL: clearance, RRT: renal replacement therapy, TM50: age at which clearance reaches 50% of adult values, V: volume of distribution*

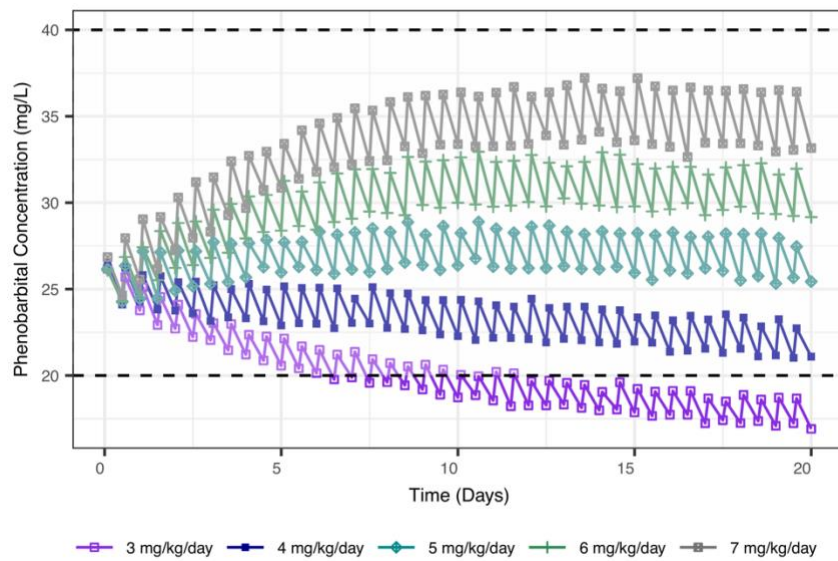

**Figure S2.** Simulated median peak and trough phenobarbital concentrations vs. time using different maintenance dosing regimens. Simulations included a loading dose of 30 mg/kg and were conducted in a typical 3.4kg infant (14 days old at first dose). The dotted lines represent goal concentrations between 20-40 mg/dL.
