# Supplementary material
Source: PubMed Central journal article supplement (PMC8214808)
Supplement: NIHMS1631676-supplement-Sup_Tab_S2.pdf [file NIHMS1631676-supplement-Sup_Tab_S2.pdf]

**Table S1. PK Sampling (N=194)**

| <b>Number of samples collected during RRT<sup>1</sup></b> | <b>Number of samples also included in previous study<sup>2</sup> (n, %)</b> | <b>Total number of samples (n, %)</b> | <b>Concentrations<sup>3</sup> (mg/L)</b> |
|-----------------------------------------------------------|-----------------------------------------------------------------------------|---------------------------------------|------------------------------------------|
| <i>Peak concentrations</i>                                |                                                                             |                                       |                                          |
| 17 (8.8%)                                                 | 27 (13.9%)                                                                  | 106 (54.6%)                           | 34.5 ± 16.1                              |
| <i>Trough concentrations</i>                              |                                                                             |                                       |                                          |
| 8 (4.1%)                                                  | 6 (3.1%)                                                                    | 41 (21.1%)                            | 29.1 ± 15.3                              |
| <i>Other</i>                                              |                                                                             |                                       |                                          |
| 5 (2.6%)                                                  | 7 (3.6%)                                                                    | 47 (24.2%)                            | 32.7 ± 16.4                              |
| <b>Total</b>                                              |                                                                             |                                       |                                          |
| 30 (15.5%)                                                | 40 (20.6%)                                                                  | 194 (100%)                            | 32.9 ± 16.0                              |

<sup>1</sup>Excluding slow continuous ultrafiltration

<sup>2</sup>Samples collected in 10 patients (representing 29% of the subjects in the current study)

<sup>3</sup>Mean value ± SD

*RRT: renal replacement therapy*

**Reference**

*Thibault C, Massey SL, Naim MY, Abend NS, Zuppa AF. Population Pharmacokinetics of IV Phenobarbital in Neonates After Congenital Heart Surgery. Pediatric Critical Care Medicine. 2020;21(8):e557-e565.*

**Table S2. Model progression**

| Description                                        | OFV         | $\Delta$ OFV | AIC         | $\Delta$ AIC |
|----------------------------------------------------|-------------|--------------|-------------|--------------|
| <i>Univariable analysis – age and maturation</i>   |             |              |             |              |
| Base model <sup>1</sup>                            | 1106        | .            | 1116        | .            |
| Age on CL                                          | 1096        | -10          | 1108        | -8           |
| <b>Age on CL – Hill equation</b>                   | <b>1094</b> | <b>-12</b>   | <b>1106</b> | <b>-10</b>   |
| PMA on CL                                          | 1101        | -5           | 1113        | -3           |
| <i>Univariable analysis</i>                        |             |              |             |              |
| <b>RRT on CL</b>                                   | <b>790</b>  | <b>-304</b>  | <b>804</b>  | <b>-302</b>  |
| SCUF on CL                                         | 1051        | -43          | 1065        | -41          |
| SCR on CL                                          | 920         | -174         | 934         | -172         |
| <i>Multivariable analysis, 1<sup>st</sup> step</i> |             |              |             |              |
| Midazolam on CL                                    | 786         | -4           | 802         | -2           |
| <b>Albumin on V</b>                                | <b>783</b>  | <b>-7</b>    | <b>799</b>  | <b>-5</b>    |
| <i>Multivariable analysis, 2<sup>nd</sup> step</i> |             |              |             |              |
| Midazolam on CL                                    | 779         | -4           | 797         | -2           |
| <b>Age on V</b>                                    | <b>776</b>  | <b>-7</b>    | <b>794</b>  | <b>-5</b>    |
| <i>Backward Analysis, 1<sup>st</sup> Step</i>      |             |              |             |              |
| <b>Drop age on V</b>                               | <b>783</b>  | <b>+7</b>    | <b>799</b>  | <b>+5</b>    |
| Drop albumin on V                                  | 787         | +8           | 803         | +9           |
| Drop RRT on CL                                     | 1088        | +312         | 1104        | +310         |
| <i>Backward Analysis, 2<sup>nd</sup> Step</i>      |             |              |             |              |
| <b>Drop albumin on V</b>                           | <b>790</b>  | <b>+7</b>    | <b>804</b>  | <b>+5</b>    |
| Drop RRT on CL                                     | 1092        | +309         | 1106        | +307         |
| <i>Backward Analysis, 3<sup>rd</sup> Step</i>      |             |              |             |              |
| Drop RRT on CL                                     | 1094        | +304         | 1106        | +302         |

<sup>1</sup>Base model includes weight on clearance and volume of distribution

AIC: Akaike Information Criteria, CL: clearance, ECMO: extracorporeal membrane oxygenation, PMA: postmenstrual age, OFV: Objective Function Value, RRT: renal replacement therapy, SCR: serum creatinine, SCUF: slow continuous ultrafiltration, V: volume of distribution
